# Supplementary material for: A carboxymethyl chitosan and peptide-decorated polyetheretherketone ternary biocomposite with enhanced antibacterial activity and osseointegration as orthopedic/dental implants
Source: Royal Society of Chemistry journal article supplement (doi:10.1039/c5tb02782a), 2016-01-01
Supplement: c5tb02782a1.pdf [file c5tb02782a1.pdf]

**Supporting information for**

**Carboxymethyl Chitosan and Peptide-Decorated Polyetheretherketone  
Ternary Biocomposite with Enhanced Antibacterial Activity and  
Osseointegration as Orthopedic/Dental Implant**

Anxiu Xu<sup>a,b,1</sup>, Liwei Zhou<sup>c,1</sup>, Yi Deng<sup>d,\*</sup>, Xianshen Chen<sup>c</sup>, Xiaoling Xiong<sup>a</sup>, Feng Deng<sup>b,\*</sup>,  
Shicheng Wei<sup>a,b,d,\*</sup>

<sup>a</sup> The 2nd Dental Center and Central Laboratory, School and Hospital of Stomatology, Peking  
University, Beijing 100081, China

<sup>b</sup> Chongqing Key Laboratory for Oral Diseases and Biomedical Sciences, Chongqing Medical  
University, Chongqing 401147, China

<sup>c</sup> Department of Stomatology, Shenzhen Maternity & Child Healthcare Hospital, Shenzhen,  
518028, China

<sup>d</sup> Center for Biomedical Materials and Tissue Engineering, Academy for Advanced  
Interdisciplinary Studies, Peking University, Beijing 100871, China.

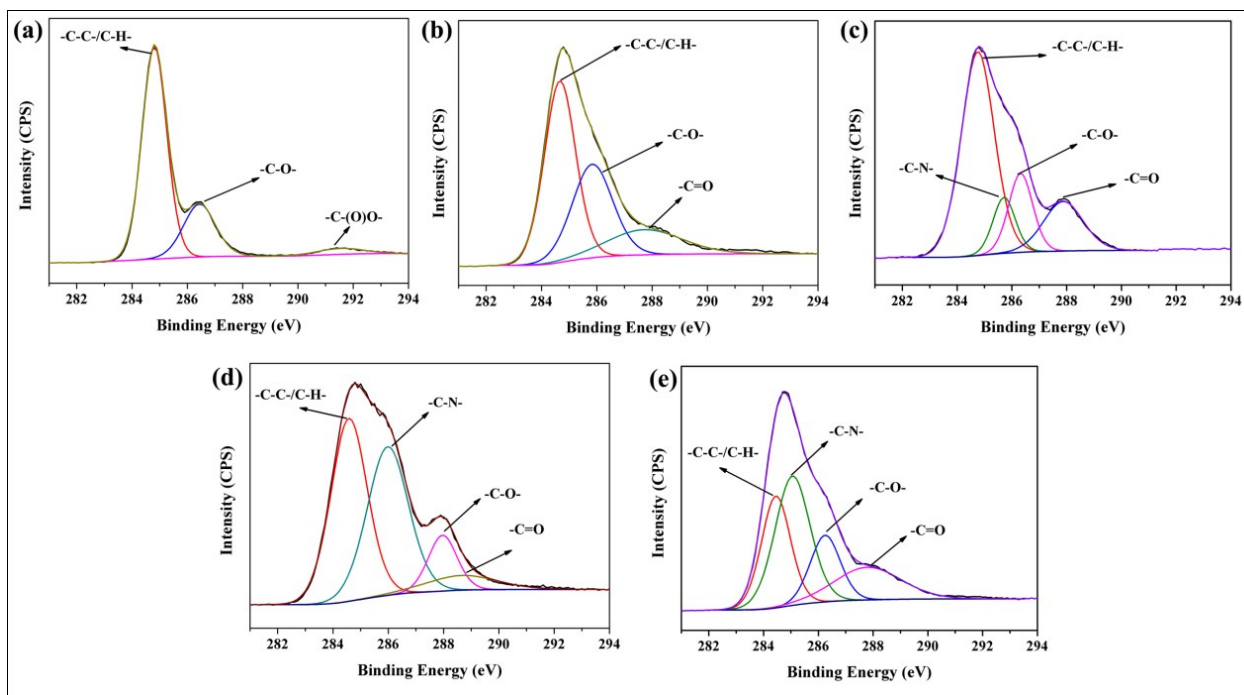

**Fig. S1.** High-resolution spectra of carbon peaks for the pristine CFRPEEK/n-HA (a), pDA-CFRPEEK/n-HA (b), CMC-CFRPEEK/n-HA (c), pep-pDA-CFRPEEK/n-HA (d), and pep-CMC-CFRPEEK/n-HA (e) substrates.

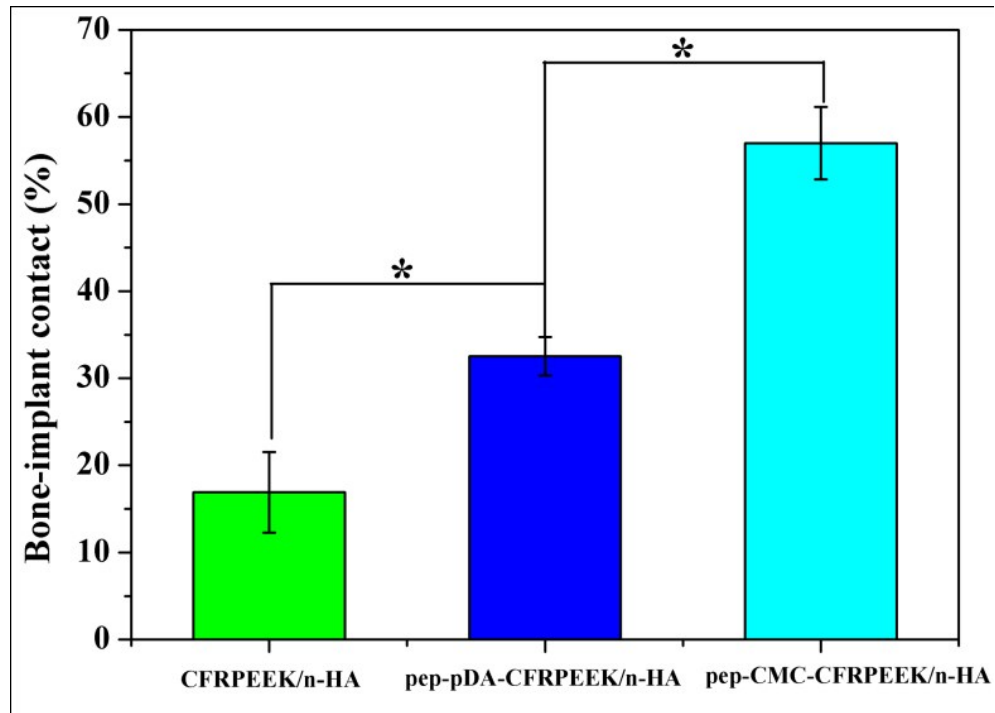

**Fig. S2.** Percentage of bone-implant contact (BIC) on three implants at 4 weeks. \* represents  $p < 0.05$  between groups.

**Table S1.** Primer sequence (5'-3') for the quantitative real-time PCR.

| Name   | Forward primer         | Reverse primer         |
|--------|------------------------|------------------------|
| GAPDH  | CGACAGTCAGCCGCATCTT    | CCAATACGACCAAATCCGTTG  |
| Runx2  | AGGAATGCGCCCTAAATCACT  | ACCCAGAAGGCACAGACAGAAG |
| ALP    | GAACGTGGTCACCTCCATCCT  | TCTCGTGGTCACAATGC      |
| Colla1 | AGACACTGGTGCTAAGGGAGAG | GACCAGCAACACCATCTGCG   |
| OCN    | CCTGAAAGCCGATGTGGT     | AGGGCAGCGAGGTAGTGA     |

**Table S2.** Elemental composition of the pristine CFRPEEK/n-HA and different decorated CFRPEEK/n-HA determined by XPS analysis.

| Samples               | C 1s (%) | O 1s  | N 1s  | Ca 2p | P 2p | Na   |
|-----------------------|----------|-------|-------|-------|------|------|
| pristine CFRPEEK/n-HA | 70.27    | 17.92 | 0     | 7.95  | 3.86 | 0    |
| pDA-CFRPEEK/n-HA      | 65.47    | 26.61 | 7.92  | 0     | 0    | 0    |
| CMC-CFRPEEK/n-HA      | 59.13    | 30.99 | 9.88  | 0     | 0    | 0    |
| pep-pDA-CFRPEEK/n-HA  | 49.32    | 35.23 | 12.97 | 0     | 0    | 2.48 |
| pep-CMC-CFRPEEK/n-HA  | 50.90    | 32.86 | 13.48 | 0     | 0    | 2.76 |
